# Supplementary material
Source: publisher figshare collection journal article supplement (https://karger.figshare.com/ndownloader/files/30462183)
Supplement: Supplementary file 1 [file 30462183]

**Supplementary data**

**Table**

Primers used for genotype analysis of additional SNP in the 19q13.32 region in the proband and his parents.

|  | **Primers sens** | **Primers antisens** |
| --- | --- | --- |
| **rs10414420** | 5'-AGTGGCTCACACCTGTAATC-3' | 5'-TTGGTAATTCTTAAACTTT-3' |
| **rs10406475** | 5'-ATCCAGTTTCAGAGACCAAC-3' | 5'-ATCTCGCCCACCCCTAGG-3' |
| **rs1603** | 5'-GGGCAACAGAGCAAGACTCT-3' | 5'-TGTACCCACAGGAGTATT-3' |
| **rs7259949** | 5'-AAGCAAAAGAAGTCCGGTTC-3' | 5'-TAAGGCAAGCTTTTACAA-3' |
| **rs8103655** | 5'-CAGCTCTCCTTATGAGAGGG-3' | 5'-CTCTCCCCTTCAATTGCTT-3' |
| **rs3786507** | 5'-CATGGGGCTCTGGGTTCAAA-3' | 5'-CCAGAGCCTCTTAGACCTC-3' |
| **rs2927439** | 5'-ATTGCTGACTCACTAGCTCT-3' | 5'-AGGCGTGCCACCGCACC-3' |
| **rs2965106** | 5'-TGGAAAATGGTTTGCCAACT-3' | 5'-ATAACACAGTTAGGTCCA-3' |
|  |  |  |
